# Supplementary material for: Genomic Analysis Made It Possible to Identify Gene-Driver Alterations Covering the Time Window between Diagnosis of Neuroblastoma 4S and the Progression to Stage 4
Source: MDPI journal article supplement (doi:10.3390/ijms23126513), 2022-06-10
Supplement: s1 [file s1]

Supplementary Table S1. Pathogenic or likely pathogenic SNVs \*

| NB driver genes              |  | Variant type    |
|------------------------------|--|-----------------|
| <i>CASZ1</i> c.4966 del G    |  | frameshift      |
| <i>PBX2</i> c.41 G>A         |  | missense        |
| <i>FGFR1</i> c.1625 del A    |  | frameshift      |
| <i>DMBT1</i> c.7217 del C    |  | frameshift      |
| <i>PTPN11</i> c.1508 G>T     |  | missense        |
| Other mutated genes          |  |                 |
| <i>HTR1D</i> c.680 G>A       |  | missense        |
| <i>TYW1</i> c.1273 C>T       |  | missense        |
| <i>LRP1B</i> c.13686 T>G     |  | stop gained     |
| <i>MAST2</i> c.1301 C>A      |  | missense        |
| <i>GNG12</i> c.202 del A     |  | frameshift      |
| <i>BARHL2</i> c.865 C>T      |  | missense        |
| <i>KCNA10</i> c.352 de lA    |  | frameshift      |
| <i>KCNA10</i> c.352 A>G      |  | missense        |
| <i>INKA2</i> c.559 del G     |  | frameshift      |
| <i>GON4L</i> c.5490 delA     |  | frameshift      |
| <i>FCRL6</i> c.1302 C>A      |  | stop gained     |
| <i>ADCY10</i> c.4518 C>A     |  | splice region   |
| <i>TDRD5</i> c.1907 del T    |  | frameshift      |
| <i>CEP350</i> c.4361 A>G     |  | missense        |
| <i>RBBP5</i> c.997 G>A       |  | missense        |
| <i>PKDCC</i> c.254G>T        |  | missense        |
| <i>ATP6V1B1</i> c.33 del G   |  | frameshift      |
| <i>DOK1</i> c.245 del C      |  | frameshift      |
| <i>AFF3</i> c.1696 del G     |  | frameshift      |
| <i>EN1</i> c.820 G>A         |  | missense        |
| <i>MYO7B</i> c.6313 C>T      |  | stop gained     |
| <i>SAP130</i> c.1787 T>A     |  | missense        |
| <i>PTPN18</i> c.826 C>T      |  | stop gained     |
| <i>MCM6</i> c.1825 G>T       |  | missense        |
| <i>VIL1</i> c.2035 C>T       |  | stop gained     |
| <i>TUBA4A</i> c.355 C>T      |  | splice region   |
| <i>TMEM198</i> c.653 G>T     |  | missense        |
| <i>MTMR14</i> c.1490 del C   |  | frameshift      |
| <i>ZBTB47</i> c.1634 A>G     |  | missense        |
| <i>LAMB2</i> c.2882 C>T      |  | missense        |
| <i>IFRD2</i> c.955_956 AA>CC |  | missense        |
| <i>PBRM1</i> c.3520 T>C      |  | missense        |
| <i>SI</i> c.1882 C>A         |  | missense        |
| <i>EVC2</i> c.24 del G       |  | frameshift      |
| <i>CRMP1</i> c.381+4323 A>G  |  | initiator codon |
| <i>SRD5A3</i> c.312 del T    |  | frameshift      |
| <i>PARM1</i> c.784 A>C       |  | missense        |
| <i>PRDM8</i> c.822 C>T       |  | splice region   |
| <i>ANK2</i> c.10367 dup G    |  | frameshift      |
| <i>CCNA2</i> c.293 C>T       |  | missense        |
| <i>PCDH10</i> c.49 T>C       |  | missense        |

|                       |               |
|-----------------------|---------------|
| AGXT2 c.1421 G>A      | missense      |
| NUP155 c.166 A>C      | missense      |
| ITGA1 c.87 C>A        | missense      |
| IK c.814 C>G          | missense      |
| PDE6A c.2381 A>G      | missense      |
| TCOF1 c.2873 del C    | frameshift    |
| NPM1 c.527 A>G        | missense      |
| NSD1 c.2903 del A     | frameshift    |
| SLC22A23 c.1864 A>T   | frameshift    |
| SLC22A23 c.932 del C  | missense      |
| ARFGEF3 c.2096 C>A    | missense      |
| ARFGEF3 c.4207 del G  | frameshift    |
| ARFGEF3 c.4207 G>T    | missense      |
| SASH1 c.1756 del A    | frameshift    |
| SYNE1 c.11394 del A   | frameshift    |
| ANLN c.523 C>T        | missense      |
| SEPTIN14 c.775 del A  | frameshift    |
| SAMD9 c.3559 del A    | frameshift    |
| KLHDC10 c.604 A>G     | missense      |
| PLXNA4 c.5573 G>A     | missense      |
| ADAM9 c.883 C>T       | missense      |
| PARP10 c.1829 A>G     | missense      |
| FAM189A2 c.1157 C>T   | missense      |
| C5 c.3479 C>T         | missense      |
| HMCN2 c.8956 G>A      | missense      |
| FUBP3 c.566 A>G       | missense      |
| CEL c.2171 del C      | frameshift    |
| TRAF2 c.26 del C      | frameshift    |
| ITGA8 c.1344 C>T      | splice region |
| ADRA2A c.1019 A>T     | missense      |
| TRPM5 c.2906 T>G      | missense      |
| CARS1 c.1265 del A    | frameshift    |
| EIF3F c.1034 A>G      | missense      |
| MRPL48 c.222 del A    | frameshift    |
| EED c.770 A>T         | missense      |
| JHY c.2216 del A      | frameshift    |
| CACNA1C c.2336 C>T    | missense      |
| STK38L c.710 G>T      | missense      |
| CAND1 c.674 del A     | frameshift    |
| BTBD11 c.2570 A>G     | missense      |
| HNF1A c.1463 C>A      | missense      |
| MYCBP2 c.1173 C>T     | splice region |
| CCDC168 c.17048 del A | frameshift    |
| CCDC168 c.12092 del A | frameshift    |
| SOX1 c.342 G>A        | splice region |
| CUL4A c.1952 G>T      | missense      |
| ABCD4 c.868 G>A       | missense      |
| RTF1 c.1098 G>A       | splice region |
| TBC1D24 c.1531 G>A    | missense      |
| SRL c.734 G>A         | missense      |
| GLYR1 c.874 A>G       | missense      |
| ITGAM c.856 G>T       | missense      |
| ZNRF1 c.199 del G     | frameshift    |
| KIAA0513 c.73 G>T     | stop gained   |

|                         |  |                 |
|-------------------------|--|-----------------|
| TRPV3 c.353 G>A         |  | missense        |
| ENO3 c.313 A>C          |  | missense        |
| DHX33 c.1393 C>G        |  | missense        |
| NLGN2 c.1967 A>G        |  | missense        |
| SLC35G6 c.997_998 GA>AC |  | missense        |
| DHRS7C c.141 A>G        |  | splice region   |
| KSR1 c.146 A>G          |  | missense        |
| MED1 c.1172 C>T         |  | missense        |
| NR1D1 c.610 C>T         |  | missense        |
| OTOP2 c.1456 del A      |  | frameshift      |
| CCDC137 c.799 C>T       |  | stop gained     |
| ZBTB7C c.1435 C>G       |  | missense        |
| ATP8B1 c.2441 A>G       |  | missense        |
| RTTN c.2303 dup A       |  | frameshift      |
| SF3A2 c.337 G>A         |  | missense        |
| ARHGEF18 c.434 A>T      |  | missense        |
| AP1M1 c.546+1201 G>T    |  | stop gained     |
| MYO9B c.4154 del A      |  | frameshift      |
| ZNF682 c.146 delA       |  | frameshift      |
| TDRD12 c.3378 dup G     |  | frameshift      |
| KIRREL2 c.606 del T     |  | frameshift      |
| LTBP4 c.3958 G>T        |  | missense        |
| CTU1 c.166 G>A          |  | missense        |
| ZSCAN18 c.1418 dup G    |  | frameshift      |
| RTF2 c.340 C>A          |  | missense        |
| TIAM1 c.3284 A>G        |  | missense        |
| RIPK4 c.27 G>T          |  | missense        |
| TRPM2 c.1273 G>A        |  | missense        |
| FOXRED2 c.1663 C>T      |  | missense        |
| BAIAP2L2 c.1392 del C   |  | frameshift      |
| NPTXR c.1 C>A           |  | initiator codon |
| GTPBP6 c.170 T>A        |  | missense        |
| TAB3 c.1772 C>T         |  | missense        |
| PPP1R2C c.202 G>A       |  | missense        |
| SASH3 c.14 A>C          |  | missense        |

Legend: \* Pathogenicity of SNVs was checked using multiple web-based applications evaluating DNA sequence variants for their disease-causing potential

- Mutation detected only in tumor onset DNA
- Mutation detected only in exo-DNA at onset
- Mutation detected only in exo-DNA at progression
- Concordant mutation in tumor DNA and in exo-DNA at progression
- Concordant mutation in tumor DNA, in exo-DNA at onset and in exo-DNA at progression

**Supplementary Table S2.** Survival of 786 NB patients in relation to *KLRB1* expression levels by *MYCN* status.

| Overall Survival                  | N/D     | OS   | 95%CI       | <i>p</i> |
|-----------------------------------|---------|------|-------------|----------|
| <i>MYCN normal</i>                |         |      |             |          |
| Cut-off based on the median value |         |      |             | 0.002    |
| ≤ 1.559                           | 314/74  | 77.1 | 72.0 – 81.4 |          |
| > 1.559                           | 315/45  | 84.6 | 79.7 – 88.4 |          |
| Cut-offs based on tertile values  |         |      |             | < 0.001  |
| ≤ 1.174                           | 209/58  | 72.2 | 65.5 – 77.9 |          |
| 1.174 – 1.945                     | 210/32  | 85.1 | 79.3 – 89.5 |          |
| > 1.945                           | 210/29  | 85.2 | 79.2 – 89.6 |          |
| <i>MYCN amplified</i>             |         |      |             |          |
| Cut-off based on the median value |         |      |             | 0.537    |
| ≤ 0.391                           | 76/54   | 28.5 | 18.7 – 39.0 |          |
| > 0.391                           | 77/54   | 29.9 | 20.1 – 40.2 |          |
| Cut-offs based on tertile values  |         |      |             | 0.803    |
| ≤ 0.152                           | 51/36   | 29.0 | 17.2 – 41.8 |          |
| 0.152 – 0.825                     | 51/31   | 39.2 | 26.0 – 52.2 |          |
| > 0.825                           | 51/41   | 19.6 | 10.1 – 31.4 |          |
| Event Free Survival               | N/E     | EFS  | 95%CI       | <i>p</i> |
| <i>MYCN normal</i>                |         |      |             |          |
| Cut-off based on the median value |         |      |             | 0.027    |
| ≤ 1.559                           | 307/116 | 62.5 | 56.8 – 67.7 |          |
| > 1.559                           | 307/91  | 70.3 | 64.9 – 75.1 |          |
| Cut-offs based on tertile values  |         |      |             | 0.001    |
| ≤ 1.174                           | 203/87  | 57.6 | 50.5 – 64.1 |          |
| 1.174 – 1.945                     | 206/62  | 69.9 | 63.1 – 75.7 |          |
| > 1.945                           | 205/58  | 71.7 | 65.0 – 77.3 |          |
| <i>MYCN amplified</i>             |         |      |             |          |
| Cut-off based on the median value |         |      |             | 0.390    |
| ≤ 0.391                           | 75/56   | 24.2 | 14.9 – 34.9 |          |
| > 0.391                           | 76/55   | 27.6 | 18.2 – 37.9 |          |
| Cut-offs based on tertile values  |         |      |             | 0.837    |
| ≤ 0.152                           | 51/39   | 21.9 | 11.1 – 34.9 |          |
| 0.152 – 0.825                     | 50/31   | 38.0 | 24.8 – 51.1 |          |
| > 0.825                           | 50/41   | 18.0 | 8.9 – 29.7  |          |

N/D = Number of patients/ Deaths. OS = Ten-year Overall Survival, N/E Number of patients/ Events. EFS = Ten-year Event Free Survival, 95%CI: 95% confidence interval.

**Supplementary Table S3.** Survival of 786 NB patients in relation to *KLRB1* expression levels by INSS stage.

| Overall Survival                  | N/D     | OS   | 95%CI       | <i>p</i> |
|-----------------------------------|---------|------|-------------|----------|
| <i>Localized stage</i>            |         |      |             |          |
| Cut-off based on the median value |         |      |             | 0.007    |
| ≤ 1.556                           | 186/25  | 86.5 | 80.7 – 90.7 |          |
| > 1.556                           | 187/10  | 94.6 | 90.2 – 97.1 |          |
| Cut-offs based on tertile values  |         |      |             | 0.002    |
| ≤ 1.196                           | 124/21  | 83.1 | 75.2 – 88.6 |          |
| 1.196 – 1.952                     | 124/7   | 94.2 | 88.3 – 97.2 |          |
| > 1.952                           | 125/7   | 94.4 | 88.6 – 97.3 |          |
| <i>Stage 4</i>                    |         |      |             |          |
| Cut-off based on the median value |         |      |             | < 0.001  |
| ≤ 1.120                           | 160/107 | 33.6 | 26.4 – 41.0 |          |
| > 1.120                           | 160/76  | 51.3 | 42.7 – 59.2 |          |
| Cut-offs based on tertile values  |         |      |             | < 0.001  |
| ≤ 0.468                           | 106/73  | 31.9 | 23.3 – 40.9 |          |
| 0.468 – 1.582                     | 107/61  | 44.4 | 34.7 – 53.6 |          |
| > 1.582                           | 107/49  | 50.7 | 39.8 – 60.6 |          |
| <i>Stage 4S</i>                   |         |      |             |          |
| Cut-off based on the median value |         |      |             | 0.113    |
| ≤ 1.474                           | 46/8    | 81.4 | 65.8 – 90.4 |          |
| > 1.474                           | 46/3    | 93.5 | 81.1 – 97.9 |          |
| Cut-offs based on tertile values  |         |      |             | n.e.     |
| ≤ 0.882                           | 30/5    | n.e. | n.e.        |          |
| 0.882 – 1.800                     | 31/5    | n.e. | n.e.        |          |
| > 1.800                           | 31/1    | n.e. | n.e.        |          |
| Event Free Survival               | N/E     | EFS  | 95%CI       | <i>p</i> |
| <i>Localized stage</i>            |         |      |             |          |
| Cut-off based on the median value |         |      |             | 0.011    |
| ≤ 1.556                           | 184/54  | 70.7 | 63.5 – 76.7 |          |
| > 1.556                           | 180/32  | 82.2 | 75.8 – 87.1 |          |
| Cut-offs based on tertile values  |         |      |             | 0.004    |
| ≤ 1.196                           | 122/41  | 66.4 | 57.3 – 74.0 |          |
| 1.196 – 1.952                     | 122/24  | 80.3 | 72.1 – 86.4 |          |
| > 1.952                           | 120/21  | 82.5 | 74.4 – 88.2 |          |
| <i>Stage 4</i>                    |         |      |             |          |
| Cut-off based on the median value |         |      |             | 0.002    |
| ≤ 1.120                           | 157/112 | 29.1 | 22.2 – 36.4 |          |
| > 1.120                           | 157/94  | 40.1 | 32.4 – 47.7 |          |
| Cut-offs based on tertile values  |         |      |             | 0.002    |
| ≤ 0.468                           | 104/77  | 26.6 | 18.4 – 35.4 |          |
| 0.468 – 1.582                     | 104/66  | 36.5 | 27.4 – 45.7 |          |
| > 1.582                           | 106/63  | 40.6 | 31.2 – 49.7 |          |
| <i>Stage 4S</i>                   |         |      |             |          |
| Cut-off based on the median value |         |      |             | 0.759    |
| ≤ 1.474                           | 44/14   | 68.2 | 52.3 – 79.8 |          |
| > 1.474                           | 46/13   | 71.7 | 56.4 – 82.5 |          |
| Cut-offs based on tertile values  |         |      |             | 0.672    |
| ≤ 0.882                           | 29/9    | 69.9 | 48.8 – 82.5 |          |
| 0.882 – 1.800                     | 30/10   | 66.7 | 46.9 – 80.5 |          |
| > 1.800                           | 31/8    | 74.2 | 55.0 – 86.2 |          |

N/D = Number of patients/ deaths. OS = Overall Survival, 95%CI: 95% confidence interval of OS. n.e. = not evaluable

**Supplementary Table S4.** Survival of 786 NB patients in relation to *FANCA* expression levels by *MYCN* status.

| Overall Survival                  | N/D     | OS   | 95%CI       | <i>p</i>          |
|-----------------------------------|---------|------|-------------|-------------------|
| <i>MYCN normal</i>                |         |      |             |                   |
| Cut-off based on the median value |         |      |             | <i>&lt; 0.001</i> |
| ≤ 3.277                           | 314/42  | 86.0 | 81.4 – 89.5 |                   |
| > 3.277                           | 315/77  | 75.8 | 70.5 – 80.3 |                   |
| Cut-offs based on tertile values  |         |      |             | <i>&lt; 0.001</i> |
| ≤ 2.960                           | 209/29  | 85.7 | 80.0 – 89.9 |                   |
| 2.960 – 3.580                     | 210/32  | 84.0 | 78.0 – 88.5 |                   |
| > 3.580                           | 210/58  | 73.0 | 66.2 – 78.6 |                   |
| <i>MYCN amplified</i>             |         |      |             |                   |
| Cut-off based on the median value |         |      |             | <i>0.927</i>      |
| ≤ 3.945                           | 76/53   | 29.6 | 19.6 – 40.3 |                   |
| > 3.945                           | 77/55   | 28.6 | 19.0 – 38.9 |                   |
| Cut-offs based on tertile values  |         |      |             | <i>0.975</i>      |
| ≤ 3.715                           | 51/38   | 24.4 | 13.3 – 37.2 |                   |
| 3.715 – 4.151                     | 51/31   | 39.2 | 26.0 – 52.2 |                   |
| > 4.151                           | 51/39   | 23.5 | 13.0 – 35.8 |                   |
| Event Free Survival               | N/E     | EFS  | 95%CI       | <i>p</i>          |
| Cut-off based on the median value |         |      |             | <i>&lt; 0.001</i> |
| ≤ 3.277                           | 304/72  | 76.3 | 71.1 – 80.7 |                   |
| > 3.277                           | 310/135 | 56.7 | 51.0 – 62.0 |                   |
| Cut-offs based on tertile values  |         |      |             | <i>&lt; 0.001</i> |
| ≤ 2.960                           | 202/46  | 77.2 | 70.8 – 82.4 |                   |
| 2.960 – 3.580                     | 205/57  | 72.2 | 65.5 – 77.8 |                   |
| > 3.580                           | 207/104 | 50.2 | 43.2 – 56.8 |                   |
| <i>MYCN amplified</i>             |         |      |             |                   |
| Cut-off based on the median value |         |      |             | <i>0.793</i>      |
| ≤ 3.945                           | 74/54   | 25.8 | 16.0 – 36.7 |                   |
| > 3.945                           | 77/57   | 26.0 | 16.8 – 36.1 |                   |
| Cut-offs based on tertile values  |         |      |             | <i>0.960</i>      |
| ≤ 3.715                           | 49/37   | 24.5 | 13.6 – 37.1 |                   |
| 3.715 – 4.151                     | 51/34   | 31.8 | 19.0 – 45.3 |                   |
| > 4.151                           | 51/40   | 21.6 | 11.6 – 33.6 |                   |

N/D = Number of patients/ Deaths. OS = Ten-year Overall Survival, N/E Number of patients/ Events. EFS = Ten-year Event Free Survival, 95%CI: 95% confidence interval.

**Supplementary Table S5.** Survival of 786 NB patients in relation to *FANCA* expression levels by INSS stage.

| Overall Survival                  | N/D     | OS   | 95%CI       | <i>p</i> |
|-----------------------------------|---------|------|-------------|----------|
| <i>Localized stage</i>            |         |      |             |          |
| Cut-off based on the median value |         |      |             | < 0.001  |
| ≤ 3.221                           | 186/7   | 96.2 | 92.2 – 98.2 |          |
| > 3.221                           | 187/28  | 85.0 | 79.0 – 89.4 |          |
| Cut-offs based on tertile values  |         |      |             | < 0.001  |
| ≤ 2.897                           | 124/2   | 98.4 | 93.7 – 99.6 |          |
| 2.897 – 3.518                     | 124/9   | 92.7 | 86.4 – 96.1 |          |
| > 3.518                           | 125/24  | 80.7 | 72.6 – 86.6 |          |
| <i>Stage 4</i>                    |         |      |             |          |
| Cut-off based on the median value |         |      |             | 0.001    |
| ≤ 3.657                           | 160/79  | 49.4 | 40.9 – 57.3 |          |
| > 3.657                           | 160/104 | 35.5 | 28.1 – 43.1 |          |
| Cut-offs based on tertile values  |         |      |             | < 0.001  |
| ≤ 3.314                           | 106/51  | 49.2 | 38.4 – 59.1 |          |
| 3.314 – 3.949                     | 107/56  | 48.8 | 38.9 – 58.0 |          |
| > 3.949                           | 107/76  | 29.2 | 20.7 – 38.2 |          |
| <i>Stage 4S</i>                   |         |      |             |          |
| Cut-off based on the median value |         |      |             | 0.822    |
| ≤ 3.307                           | 46/6    | 87.0 | 73.3 – 93.9 |          |
| > 3.307                           | 46/5    | 87.5 | 71.7 – 94.8 |          |
| Cut-offs based on tertile values  |         |      |             | n.e.     |
| ≤ 3.134                           | 30/4    | n.e. | n.e.        |          |
| 3.134 – 3.672                     | 31/4    | n.e. | n.e.        |          |
| > 3.672                           | 31/3    | n.e. | n.e.        |          |
| Event Free Survival               | N/E     | EFS  | 95%CI       | <i>p</i> |
| <i>Localized stage</i>            |         |      |             |          |
| Cut-off based on the median value |         |      |             | < 0.001  |
| ≤ 3.221                           | 179/22  | 87.7 | 81.9 – 91.7 |          |
| > 3.221                           | 185/64  | 65.4 | 58.1 – 71.8 |          |
| Cut-offs based on tertile values  |         |      |             | < 0.001  |
| ≤ 2.897                           | 118/11  | 90.7 | 83.8 – 94.7 |          |
| 2.897 – 3.518                     | 123/23  | 81.3 | 73.2 – 87.2 |          |
| > 3.518                           | 123/52  | 57.7 | 48.5 – 65.9 |          |
| <i>Stage 4</i>                    |         |      |             |          |
| Cut-off based on the median value |         |      |             | 0.003    |
| ≤ 3.657                           | 155/90  | 41.9 | 34.1 – 49.6 |          |
| > 3.657                           | 159/116 | 27.3 | 20.5 – 34.5 |          |
| Cut-offs based on tertile values  |         |      |             | < 0.001  |
| ≤ 3.314                           | 105/59  | 43.8 | 34.2 – 53.0 |          |
| 3.314 – 3.949                     | 102/65  | 36.9 | 27.5 – 46.2 |          |
| > 3.949                           | 107/82  | 23.4 | 15.9 – 31.7 |          |
| <i>Stage 4S</i>                   |         |      |             |          |
| Cut-off based on the median value |         |      |             | 0.748    |
| ≤ 3.307                           | 44/13   | 70.5 | 54.6 – 81.7 |          |
| > 3.307                           | 46/14   | 69.6 | 54.1 – 80.7 |          |
| Cut-offs based on tertile values  |         |      |             | 0.221    |
| ≤ 3.134                           | 29/7    | 75.9 | 55.9 – 87.7 |          |
| 3.134 – 3.672                     | 30/9    | 70.0 | 50.3 – 83.1 |          |
| > 3.672                           | 31/11   | 64.5 | 45.2 – 78.5 |          |

N/D = Number of patients/ deaths. OS = Overall Survival, 95%CI: 95% confidence interval of OS. n.e. = not evaluable

**Supplementary Table S6.** Survival of 786 NB patients in relation to MPAK3 expression levels by MYCN status.

| Overall Survival                  | N/D     | OS   | 95%CI       | <i>p</i> |
|-----------------------------------|---------|------|-------------|----------|
| <i>MYCN normal</i>                |         |      |             |          |
| Cut-off based on the median value |         |      |             | 0.195    |
| ≤ 3.880                           | 314/53  | 83.5 | 78.9 – 87.3 |          |
| > 3.880                           | 315/66  | 78.1 | 72.8 – 82.5 |          |
| Cut-offs based on tertile values  |         |      |             | 0.235    |
| ≤ 3.696                           | 209/37  | 82.5 | 76.5 – 87.1 |          |
| 3.696 – 4.057                     | 210/35  | 83.5 | 77.6 – 87.9 |          |
| > 4.057                           | 210/47  | 76.6 | 69.7 – 82.0 |          |
| <i>MYCN amplified</i>             |         |      |             |          |
| Cut-off based on the median value |         |      |             | 0.194    |
| ≤ 3.625                           | 76/51   | 32.9 | 22.7 – 43.5 |          |
| > 3.625                           | 77/57   | 24.2 | 14.6 – 35.2 |          |
| Cut-offs based on tertile values  |         |      |             | 0.220    |
| ≤ 3.494                           | 51/37   | 27.5 | 16.1 – 40.0 |          |
| 3.494 – 3.894                     | 51/30   | 41.2 | 27.7 – 54.2 |          |
| > 3.894                           | 51/41   | 21.6 | 11.6 – 33.6 |          |
| Event Free Survival               | N/E     | EFS  | 95%CI       | <i>p</i> |
| Cut-off based on the median value |         |      |             | 0.923    |
| ≤ 3.880                           | 314/106 | 66.5 | 61.0 – 71.5 |          |
| > 3.880                           | 300/101 | 66.3 | 60.7 – 71.4 |          |
| Cut-offs based on tertile values  |         |      |             | 0.940    |
| ≤ 3.696                           | 209/74  | 64.6 | 57.7 – 70.6 |          |
| 3.696 – 4.057                     | 210/63  | 70.5 | 63.8 – 76.2 |          |
| > 4.057                           | 195/70  | 64.1 | 56.9 – 70.4 |          |
| <i>MYCN amplified</i>             |         |      |             |          |
| Cut-off based on the median value |         |      |             | 0.280    |
| ≤ 3.625                           | 76/54   | 28.4 | 18.6 – 38.9 |          |
| > 3.625                           | 75/57   | 24.0 | 15.1 – 34.1 |          |
| Cut-offs based on tertile values  |         |      |             | 0.480    |
| ≤ 3.494                           | 51/38   | 25.5 | 14.6 – 37.9 |          |
| 3.494 – 3.894                     | 51/34   | 31.8 | 19.0 – 45.3 |          |
| > 3.894                           | 49/39   | 20.4 | 10.5 – 32.6 |          |

N/D = Number of patients/ Deaths. OS = Ten-year Overall Survival, N/E Number of patients/ Events. EFS = Ten-year Event Free Survival, 95%CI: 95% confidence interval.



**Supplementary Table S7.** Survival of 786 NB patients in relation to MAPK3 expression levels by INSS stage.

| Overall Survival                  | N/D     | OS   | 95%CI       | <i>p</i> |
|-----------------------------------|---------|------|-------------|----------|
| <i>Localized stage</i>            |         |      |             |          |
| Cut-off based on the median value |         |      |             | 0.112    |
| ≤ 3.868                           | 186/22  | 88.1 | 82.5 – 92.0 |          |
| > 3.868                           | 187/13  | 93.0 | 88.2 – 95.9 |          |
| Cut-offs based on tertile values  |         |      |             | 0.027    |
| ≤ 3.652                           | 124/20  | 83.9 | 76.1 – 89.3 |          |
| 3.652 – 4.038                     | 124/5   | 95.9 | 90.4 – 98.3 |          |
| > 4.038                           | 125/10  | 91.9 | 85.5– 95.6  |          |
| <i>Stage 4</i>                    |         |      |             |          |
| Cut-off based on the median value |         |      |             | 0.715    |
| ≤ 3.817                           | 160/88  | 44.9 | 36.9– 52.6  |          |
| > 3.817                           | 160/95  | 40.0 | 32.0 – 47.9 |          |
| Cut-offs based on tertile values  |         |      |             | 0.926    |
| ≤ 3.619                           | 106/61  | 42.8 | 33.1 – 52.1 |          |
| 3.619 – 4.005                     | 107/57  | 47.4 | 37.6 – 56.5 |          |
| > 4.005                           | 101/65  | 36.7 | 26.7 – 46.8 |          |
| <i>Stage 4S</i>                   |         |      |             |          |
| Cut-off based on the median value |         |      |             | 0.003    |
| ≤ 3.822                           | 46/1    | 97.8 | 85.6 – 99.7 |          |
| > 3.822                           | 46/10   | 77.8 | 60.6 – 87.0 |          |
| Cut-offs based on tertile values  |         |      |             | n.e.     |
| ≤ 3.686                           | 30/0    | n.e. | n.e.        |          |
| 3.686 – 4.057                     | 31/7    | n.e. | n.e.        |          |
| > 4.057                           | 31/4    | n.e. | n.e.        |          |
| Event Free Survival               | N/E     | EFS  | 95%CI       | <i>p</i> |
| <i>Localized stage</i>            |         |      |             |          |
| Cut-off based on the median value |         |      |             | 0.083    |
| ≤ 3.868                           | 186/51  | 72.6 | 65.6 – 78.4 |          |
| > 3.868                           | 178/35  | 80.3 | 73.7 – 85.5 |          |
| Cut-offs based on tertile values  |         |      |             | 0.136    |
| ≤ 3.652                           | 124/37  | 70.2 | 61.3 – 77.4 |          |
| 3.652 – 4.038                     | 124/24  | 80.7 | 72.5 – 86.6 |          |
| > 4.038                           | 116/25  | 78.5 | 69.8 – 84.9 |          |
| <i>Stage 4</i>                    |         |      |             |          |
| Cut-off based on the median value |         |      |             | 0.372    |
| ≤ 3.817                           | 160/108 | 32.8 | 25.6 – 40.2 |          |
| > 3.817                           | 154/98  | 36.4 | 28.8 – 43.9 |          |
| Cut-offs based on tertile values  |         |      |             | 0.469    |
| ≤ 3.619                           | 106/71  | 32.4 | 23.5 – 41.5 |          |
| 3.619 – 4.005                     | 107/70  | 35.5 | 26.6 – 44.5 |          |
| > 4.005                           | 101/65  | 35.6 | 26.5 – 44.9 |          |
| <i>Stage 4S</i>                   |         |      |             |          |
| Cut-off based on the median value |         |      |             | 0.032    |
| ≤ 3.822                           | 46/9    | 80.4 | 65.8 – 89.3 |          |
| > 3.822                           | 44/18   | 59.1 | 43.2 – 71.9 |          |
| Cut-offs based on tertile values  |         |      |             | 0.101    |
| ≤ 3.686                           | 30/5    | 83.3 | 64.5 – 92.7 |          |
| 3.686 – 4.057                     | 31/11   | 64.5 | 45.2 – 78.5 |          |
| > 4.057                           | 29/11   | 62.1 | 42.1 – 76.9 |          |

N/D = Number of patients/ deaths. OS = Overall Survival, 95%CI: 95% confidence interval of OS. n.e. = not evaluable

**Supplementary Table S8.** Main characteristics of the 786 NB patients selected for the analyses.

| Patient characteristics  | N   | %    |
|--------------------------|-----|------|
| <i>Age at diagnosis</i>  |     |      |
| < 18 months              | 449 | 57.1 |
| ≥ 18 months              | 337 | 42.9 |
| <i>Disease extension</i> |     |      |
| Localized                | 373 | 47.5 |
| Disseminated             | 412 | 52.4 |
| Missing                  | 1   | 0.1  |
| <i>INSS stage</i>        |     |      |
| 1                        | 143 | 18.2 |
| 2                        | 125 | 15.9 |
| 3                        | 105 | 13.4 |
| 4                        | 320 | 40.7 |
| 4S                       | 92  | 11.7 |
| Missing                  | 1   | 0.1  |
| <i>MYCN status</i>       |     |      |
| Not amplified            | 629 | 80.0 |
| Amplified                | 153 | 19.5 |
| Missing                  | 4   | 0.5  |
| Events <sup>1</sup>      | 320 | 40.7 |
| Deaths                   | 229 | 29.1 |

<sup>1</sup> 17 missing for the Event Free Survival.
